# Supplementary material
Source: MDPI journal article supplement (https://www.mdpi.com/2073-4441/15/18/3228)
Supplement: s1 [file s1]

**Table S1** Site location and the hydrological station

| Site name | Location  | Altitude  | Longitude  | Hydrological station | LWL (m) | DLWL         | HWL (m) | DHWL         |
|-----------|-----------|-----------|------------|----------------------|---------|--------------|---------|--------------|
| Z1        | Jiangjin  | 29.246077 | 106.250984 | Taping               | 179.27  | 11 Feb. 2019 | 190.21  | 9 Aug. 2019  |
| Z2        | Jiangbei  | 29.573118 | 106.579674 | Cuntan               | 161.04  | 8 May 2019   | 178.16  | 9 Aug. 2019  |
| Z3        | Changshou | 29.812378 | 107.073555 | Changshou            | 152.13  | 7 June 2019  | 175.41  | 27 Oct. 2019 |
| Z4        | Fuling    | 29.846245 | 107.481644 | Qingxichang          | 148.34  | 7 June 2019  | 174.95  | 1 Nov. 2018  |
| Z5        | Fengdu    | 30.037449 | 107.867424 | Gaojiazhen           | 147.17  | 7 June 2019  | 174.57  | 1 Nov. 2018  |
| Z6        | Zhongxian | 30.305717 | 108.110085 | Zhongxian            | 146.28  | 7 June 2019  | 174.94  | 1 Nov. 2018  |
| Z7        | Wanzhou   | 30.900988 | 108.505836 | Wanxian              | 146.18  | 7 June 2019  | 175.13  | 1 Nov. 2018  |
| Z8        | Yunyang   | 30.940229 | 109.008026 | Yunyang              | 145.80  | 7 June 2019  | 174.95  | 1 Nov. 2018  |
| Z9        | Fengjie   | 31.011332 | 109.450493 | Fengjie              | 145.26  | 7 June 2019  | 174.62  | 1 Nov. 2018  |
| Z10       | Wushan    | 31.029572 | 109.742584 | Wushan               | 145.17  | 7 June 2019  | 174.71  | 1 Nov. 2018  |
| Z11       | Badong    | 31.061711 | 110.395264 | Badong               | 145.17  | 7 June 2019  | 174.97  | 1 Nov. 2018  |
| Z12       | Zigui     | 30.880036 | 110.910706 | Sanxia               | 145.04  | 7 June 2019  | 175.01  | 1 Nov. 2018  |

LWL, The lowest water level; DLWL, Date of occurrence of lowest water level; HWL, The highest water level; DHWL, Date of occurrence of highest water level. The water level calculated for each site is from October 2018 through October 2019.

**Table S2** Plant functional traits and ecosystem processes and service

| trait               | description                                                                                                                                                       | Measurement scale | Ecosystem services |
|---------------------|-------------------------------------------------------------------------------------------------------------------------------------------------------------------|-------------------|--------------------|
| Reproductive traits |                                                                                                                                                                   |                   |                    |
| Dispersal type      | Three types according to van der Pijl [52]:1:anemochory; 2:endozoochory&exozoochory;3:ballistochory;myrmecochory;unassisted.                                      | nominal           | Regulating service |
| Vegetative traits   |                                                                                                                                                                   |                   |                    |
| Growth form         | Two classes: Graminoids and Herbs                                                                                                                                 | Nominal           | Supporting service |
| Life cycle          | Annual; Biennial and Perennial                                                                                                                                    | Nominal           | Supporting service |
| Max. height(m)      | Five classes modified from Hodgson et al. [53]: 1:<0.1m;2:0.11-0.29m;3:0.30-0.59m;4:0.600.99m;5:1.0-3.0m                                                          | Ordinal           | Supporting service |
| Phenological traits |                                                                                                                                                                   |                   |                    |
| Flowering phenology | Five classes according to Mabry et al. [54]:1:spring flowering; 2:mid-summer flowering;3:spring-mid-summer flowering;4:fall flowering;5:mid-summer-fall flowering | Nominal           | Regulating service |
